# Supplementary material
Source: MDPI journal article supplement (https://www.mdpi.com/2072-4292/6/5/3533)
Supplement: s1 [file s1]

# Allometric Scaling and Resource Limitations Model of Tree Heights: Part 3. Model Optimization and Testing over Continental China. *Remote Sensing*, 2014, 6, 3533–3553

Xiliang Ni <sup>1,2,†</sup>, Taejin Park <sup>2,\*†</sup>, Sungho Choi <sup>2</sup>, Yuli Shi <sup>2,3</sup>, Chunxiang Cao <sup>1</sup>, Xuejun Wang <sup>4</sup>, Michael A. Lefsky <sup>5</sup>, Marc Simard <sup>6</sup> and Ranga B. Myneni <sup>2</sup>

<sup>1</sup> State Key Laboratory of Remote Sensing Science, Institute of Remote Sensing and Digital Earth, Chinese Academy of Sciences, Beijing 100101, China; E-Mails: nixl@irsa.ac.cn (X.N.); cao413@irsa.ac.cn (C.C.)

<sup>2</sup> Department of Earth and Environment, Boston University, 675 Commonwealth Avenue, Boston, MA 02215, USA; Emails: schoi@bu.edu (S.C.); ylshi.nuist@gmail.com (Y.S.); ranga.myneni@gmail.com (R.B.M.)

<sup>3</sup> School of Remote Sensing, Nanjing University of Information Science and Technology, Nanjing 210044, China

<sup>4</sup> Survey Planning and Design Institute, State Forest Administration of China, Beijing 100714, China; E-Mail: wangxuejun320@126.com

<sup>5</sup> Center for Ecological Analysis of Lidar, Natural Resource Ecology Laboratory, Colorado State University, Fort Collins, CO 80523, USA; E-Mail: lefsky@cnr.colostate.edu

<sup>6</sup> Jet Propulsion Laboratory, California Institute of Technology, Pasadena, CA 91109, USA; E-Mail: marc.simard@jpl.nasa.gov

† These authors contributed equally to this work.

\* Author to whom correspondence should be addressed; E-Mail: partj@bu.edu; Tel.: +1-617-893-1988; Fax: +1-617-353-8399.

## S1. List of Abbreviations

|        |                                                                |
|--------|----------------------------------------------------------------|
| ASRL   | Allometric Scaling and Resource Limitations                    |
| ASTER  | Advanced Spaceborne Thermal Emission and Reflection Radiometer |
| CMDSSS | China Meteorological Data Sharing Service System               |
| CONNA  | Continental China                                              |
| DEM    | Digital Elevation Model                                        |
| DBH    | Diameter at Breast Height                                      |
| GDEM   | Global Digital Elevation Map                                   |
| GLA14  | GLAS Level-2 Land Surface Altimetry                            |

|            |                                               |
|------------|-----------------------------------------------|
| GLAS       | Geoscience Laser Altimeter System             |
| $H_{ASRL}$ | Predicted Height from optimized ASRL model    |
| $H_{GLAS}$ | Measured Height from valid GLAS waveform data |
| $H_{NFI}$  | Measured Height from NFI                      |
| LC         | Land Cover                                    |
| MODIS      | Moderate Resolution Imaging Spectroradiometer |
| MRE        | Mean Relative Error                           |
| NFI        | National Forest Inventory                     |
| SD         | Standard Deviation                            |
| SFA        | State Forestry Administration                 |
| VCF        | Vegetation Continuous Fields                  |

## S2. Figures S1–S5

**Figure S1.** Geographical distribution of meteorological stations used for climatic variable construction ( $n = 754$ ; in red color) and site-specific evaluation ( $n = 14$ ; in blue color). The CMDSSS provides meteorological observations from these stations for a temporal period of 1951–2007. Forested lands are depicted in green color.

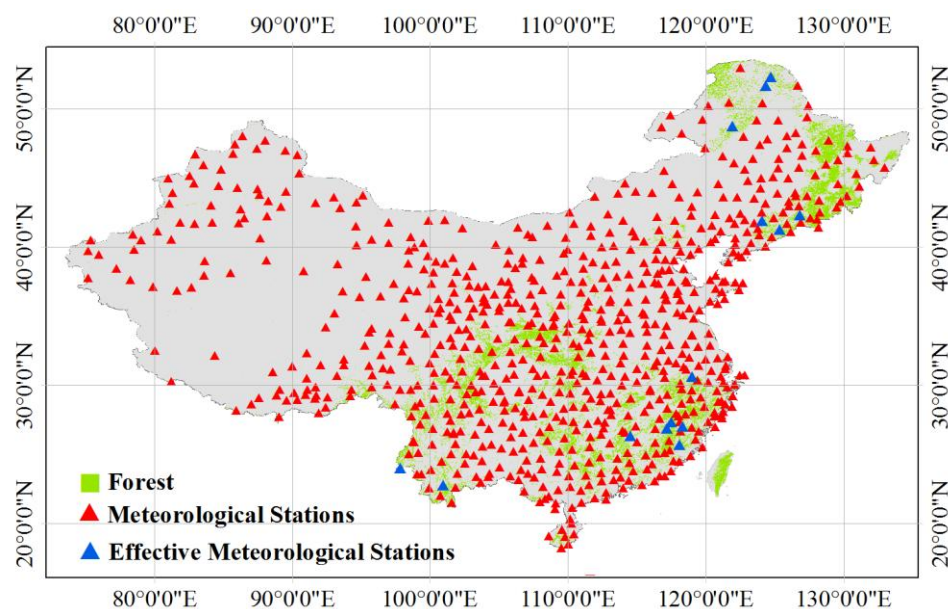

**Figure S2.** Distribution of maximum tree heights derived from (a) the valid GLAS shots and (b) the NFI dataset at a 1km spatial resolution. The GLAS altimetry was generated after filtering invalid GLAS shots and correcting topographic effects [S1]. The NFI tree heights were estimated using the allometric relationships between field-measured DBH and height (surveyed by the SFA [S2–S4]). Note that the NFI map is limited over the northeastern regions of CONNA since we considered the forested lands over the effective climate zones.

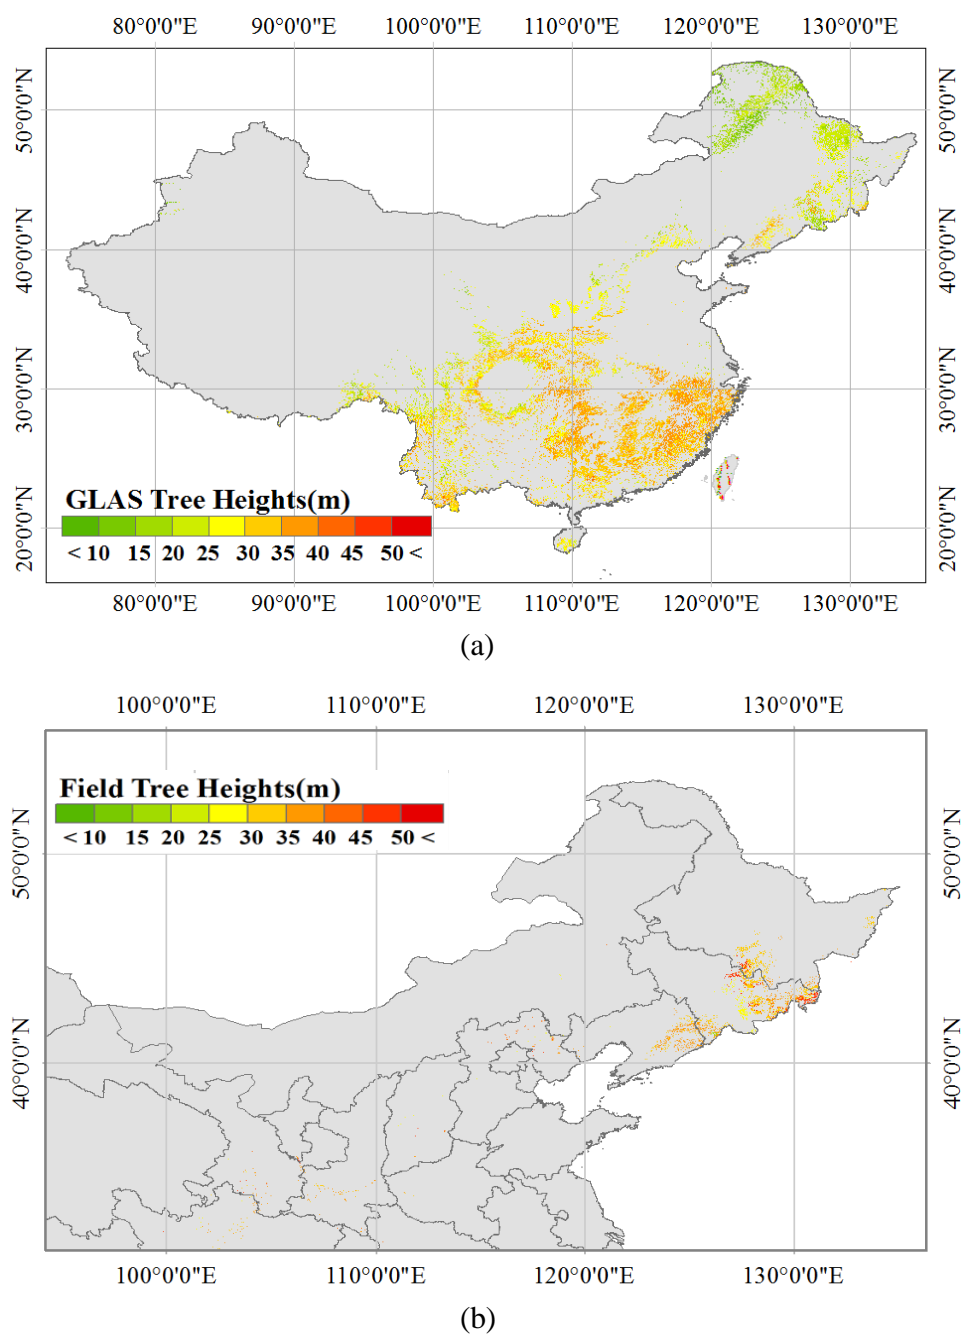

**Figure S3.** Distribution of relative errors for site-specific simulations of the optimized ASRL model: (a) two-fold cross validation and (b) bootstrapping validation. The MRE (dotted line) and SD of relative errors are notated in each plot.

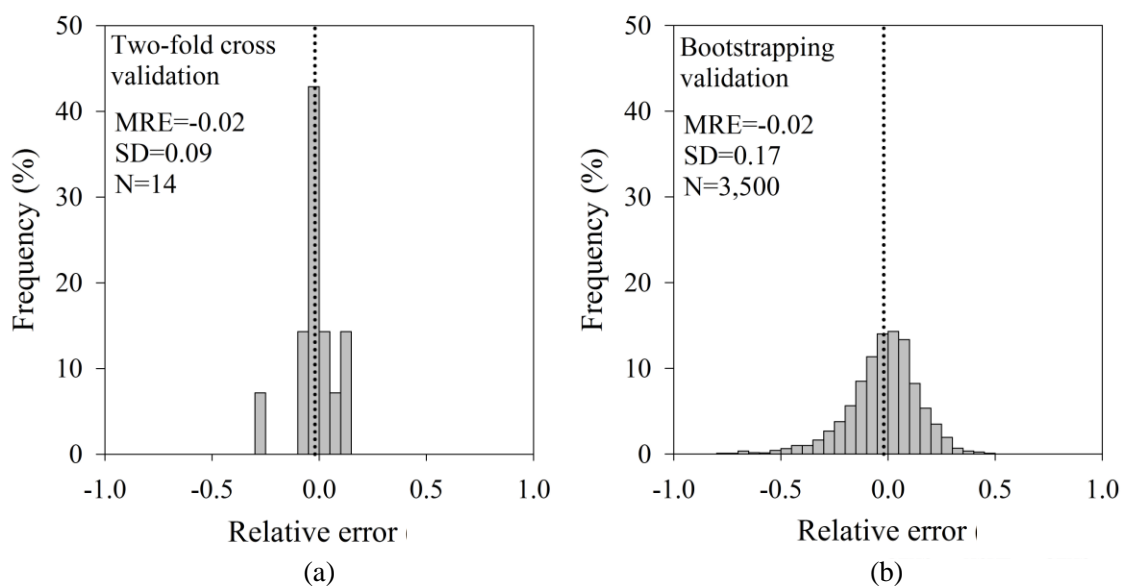

**Figure S4.** Distribution of relative errors for continental-scale simulations of the optimized ASRL model: (a) two-fold cross validation with GLAS observations and (b) one-to-one validation with field measurements. The MRE (dotted line) and SD of relative error are notated in each plot.

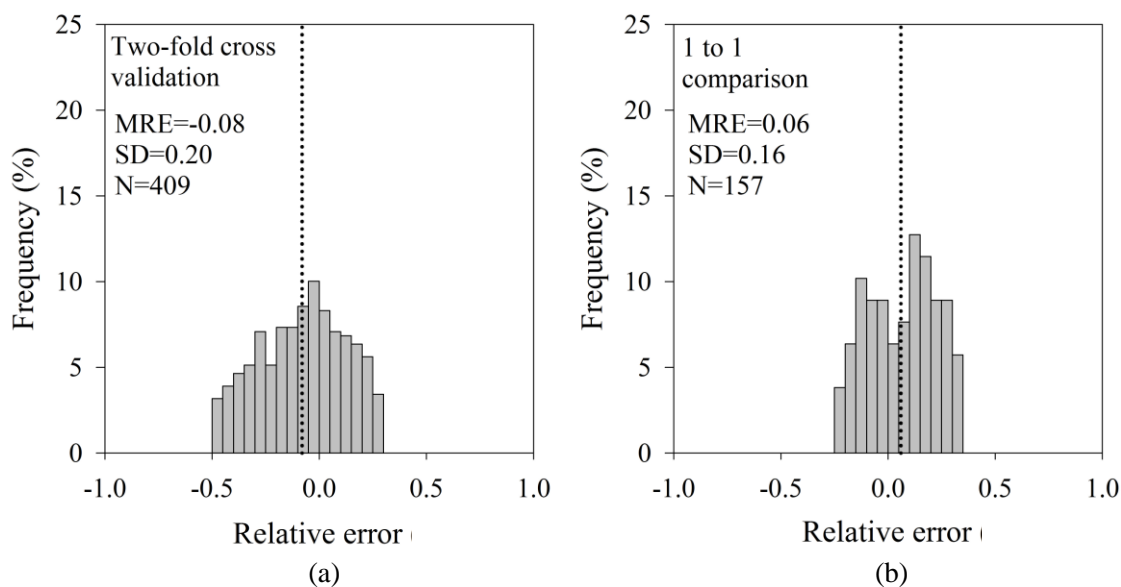

**Figure S5.** Spatial distribution of prediction errors of the optimized ASRL model: comparisons against (a) test GLAS dataset ( $H_{ASRL} - H_{GLAS}$ ), and (b) field measurements ( $H_{ASRL} - H_{NFI}$ ). Note that the NFI map is limited over the northeastern regions of CONNA since we considered the forested lands over the effective climate zones.

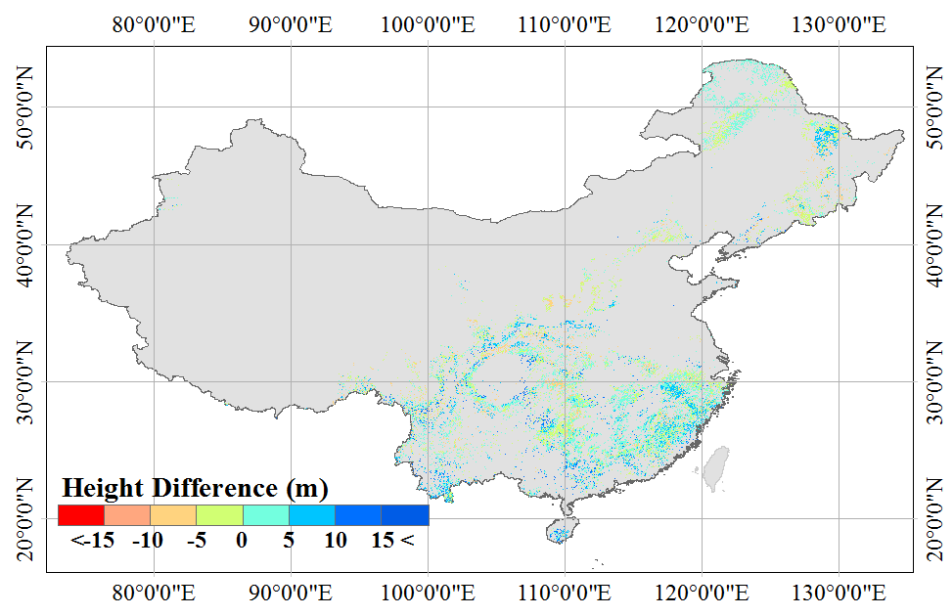

(a)

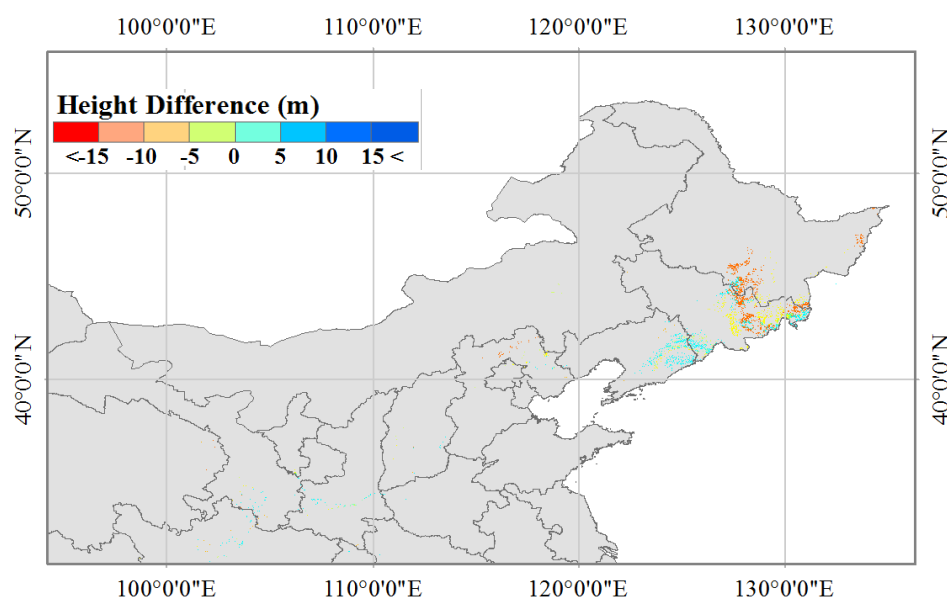

(b)

## S3. Table S1

**Table S1.** List of datasets to derive the valid GLAS tree heights. Ancillary data (LC, VCF, DEM, and slope) were used to filter invalid GLAS shots and to correct topographic effects.

| Data  | Source                          | Spatial Resolution           | Acquisition Year                   |
|-------|---------------------------------|------------------------------|------------------------------------|
| GLAS  | GLA14 [S5]                      | 70 m<br>(Circular footprint) | 2003–2006<br>(Only in May–October) |
| LC    | MODIS MCD12Q1 [S6]              | 500 m                        | 2005                               |
| VCF   | MODIS MOD44B [S6]               | 250 m                        | 2005                               |
| DEM   | ASTER GDEM V2 [S6]              | 30 m                         | 2011                               |
| Slope | Derived from ASTER GDEM V2 [S7] | 30 m                         | 2011                               |

## Reference

- S1. Choi, S.; Ni, X.; Shi, Y.; Ganguly, S.; Zhang, G.; Duong, H.V.; Lefsky, M.A.; Simard, M.; Saatchi, S.S.; Lee, S. Allometric scaling and resource limitations model of tree heights: Part 2. Site based testing of the model. *Remote Sens.* **2013**, *5*, 202–223.
- S2. Huang, S.; Titus, S.J.; Wiens, D.P. Comparison of nonlinear height-diameter functions for major Alberta tree species. *Can. J. Forest Res.* **1992**, *22*, 1297–1304.
- S3. Fang, Z.; Bailey, R. Height-diameter models for tropical forests on Hainan Island in southern China. *For. Ecol. Manage.* **1998**, *110*, 315–327.
- S4. Huang, S.; Price, D.; Titus, S.J. Development of ecoregion-based height-diameter models for white spruce in boreal forests. *For. Ecol. Manage.* **2000**, *129*, 125–141.
- S5. National Snow & Ice Data Center. Available online: <http://nsidc.org/data/icesat/> (accessed on 15 March 2013).
- S6. Land Processes Distributed Active Archive Center. Available online: <http://verb.echo.nasa.gov/> (accessed on 15 March 2013).
- S7. Environmental Systems Research Institute. *ArcGIS Desktop: Release 10*; Environmental Systems Research Institute: Redlands, CA, USA, 2011.
